# Supplementary material for: Flavor Characterization of Animal Hydrolysates and Potential of Glucosamine in Flavor Modulation
Source: MDPI journal article supplement (doi:10.3390/foods10123008), 2021-12-04
Supplement: s1 [file s1]

**Table S1.** Hydrolysates produced by 5 h enzymatic hydrolysis with Protease A based on different types of raw material and glucosamine (G) addition at a ratio of 1:10 relative to the protein content of the raw materials.

| Animal source      | Glucosamine addition | Inactivation temp. | Product name |
|--------------------|----------------------|--------------------|--------------|
| Bovine meat        | No                   | 90                 | Meat         |
|                    | G 1:10               | 90                 | Meat+G       |
| Bovine heart       | No                   | 90                 | Heart        |
|                    | G 1:10               | 90                 | Heart+G      |
| Porcine hemoglobin | No                   | 90                 | Hemo         |
|                    | G 1:10               | 90                 | Hemo+G       |
| Porcine plasma     | No                   | 85                 | Plasma       |
|                    | G 1:10               | 85                 | Plasma+G     |

**Table S2.** Peak areas ( $\times 10^{-5}$ ) of the volatile compounds in the hydrolysates with or without glucosamine (G) relative to the peak area of the internal standard. Different letters within the same rows indicate significant ( $P < 0.05$ ) differences according to Tukey's test.

| Compound              | Meat    | Meat+G | Heart   | Heart+G | Hemo  | Hemo+G | Plasma | Plasma+G | Retention index |                       |
|-----------------------|---------|--------|---------|---------|-------|--------|--------|----------|-----------------|-----------------------|
|                       |         |        |         |         |       |        |        |          | Exp.            | Auth. std. Literature |
| <b>Alcohol</b>        |         |        |         |         |       |        |        |          |                 |                       |
| Ethanol               | 287ab   | 411a   | 180ab   | 176ab   | 189ab | 271ab  | 82b    | 115ab    | 938             | 883-972               |
| 1-Butanol             | 342ab   | 425ab  | 409ab   | 559a    | 67c   | 184bc  | 83c    | 60c      | 1163            | 1165                  |
| 2-Methyl-1-butanol    | 28b     | 143b   | 384a    | 481a    | 111b  | 88b    | 125b   | 113b     | 1220            | 1158-1244             |
| 3-Methyl-1-butanol    | 142e    | 258de  | 658ab   | 821a    | 241de | 182de  | 519bc  | 403cd    | 1222            | 1238                  |
| 3-Methyl-3-buten-1-ol | 158b    | 157b   | 264b    | 306b    | 146b  | 155b   | 598a   | 500a     | 1265            | 1221-1277             |
| 1-Pentanol            | 13795a  | 12596a | 1646b   | 1479b   | 355b  | 5629ab | 688b   | 593b     | 1271            | 1274                  |
| 1-Hexanol             | 2929ab  | 3980a  | 609c    | 663c    | 377c  | 1315bc | 193c   | 203c     | 1369            | 1372                  |
| 1-Octen-3-ol          | 12660ab | 16047a | 11936ab | 6687ab  | 1600b | 7394ab | 7136ab | 9715ab   | 1461            | 1464                  |

|                                      |              |              |              |              |             |              |               |               |      |      |           |
|--------------------------------------|--------------|--------------|--------------|--------------|-------------|--------------|---------------|---------------|------|------|-----------|
| 1-Heptanol                           | 2279a        | 2198ab       | 455abc       | 476abc       | 73c         | 1005abc      | 186bc         | 196bc         | 1467 | 1470 |           |
| 2-Ethyl-1-hexanol                    | 377bc        | 785bc        | <b>1052b</b> | <b>1880a</b> | 188c        | 463bc        | 180c          | 174c          | 1500 | 1503 |           |
| 1-Octanol                            | 1689ab       | 1843a        | 622ab        | 765ab        | 452b        | 994ab        | 1401ab        | 1746a         | 1569 | 1570 |           |
| (E)-2-Octen-1-ol                     | 2360bc       | 2762bc       | 1716bc       | 1366bc       | 978c        | 1642bc       | 3549ab        | 5835a         | 1627 |      | 1577-1649 |
| <b>Aldehyde</b>                      |              |              |              |              |             |              |               |               |      |      |           |
| 2-Methylpropanal                     | 259c         | 927abc       | 1083ab       | 1407a        | 615abc      | 410bc        | 1187ab        | 643abc        | 812  | 813  |           |
| 2-Propenal                           | 120bc        | 822abc       | 961ab        | 1287a        | 105bc       | 182bc        | 67c           | 86bc          | 840  |      | 828-876   |
| 2-Methylbutanal                      | 2241de       | 6189cd       | 11117b       | 9533bc       | 419e        | 1457e        | <b>19984a</b> | <b>10176b</b> | 911  |      | 880-963   |
| 3-Methylbutanal                      | 6642e        | 19183bcde    | 30848bc      | 27629bcd     | 15876cde    | 12399de      | <b>58481a</b> | <b>33694b</b> | 915  | 917  |           |
| Pentanal                             | 767bc        | 3196ab       | 5408a        | 3921a        | 167c        | 739bc        | 349c          | 246c          | 975  | 983  |           |
| (E)-2-Butenal                        | 34c          | 33c          | <b>258b</b>  | <b>499a</b>  | 8c          | 13c          | 33c           | 21c           | 1030 |      | 1002-1084 |
| Hexanal                              | 6238b        | 23054b       | 95480a       | 59608ab      | 631b        | 5693b        | 705b          | 758b          | 1081 | 1082 |           |
| (E)-2-Methyl-2-butenal               | <b>730b</b>  | <b>3312a</b> | 2904a        | 2536a        | ND          | 668b         | 86b           | 198b          | 1088 |      | 1012-1113 |
| Heptanal                             | 1395bcd      | 4521ab       | 5199a        | 4180abc      | 267d        | 908cd        | 409d          | 347d          | 1188 | 1189 |           |
| 3-Methyl-2-butenal                   | <b>513cd</b> | <b>3304a</b> | 2831ab       | 2471b        | <b>225d</b> | <b>1036c</b> | 80d           | 181d          | 1197 |      | 1189-1236 |
| Octanal                              | 1040abc      | 2840a        | 2889a        | 2302ab       | 404c        | 883bc        | 541bc         | 511bc         | 1302 | 1306 |           |
| Nonanal                              | 2514ab       | 6374ab       | 7183a        | 6883a        | 1307b       | 2097ab       | 1299b         | 1276b         | 1399 | 1402 |           |
| 5-Ethylcyclopent-1-enecarboxaldehyde | 52c          | 239c         | <b>946a</b>  | <b>624b</b>  | 16c         | 51c          | 27c           | 28c           | 1423 |      | 1399-1428 |
| (E)-2-Octenal                        | 270bc        | 1271b        | 4158a        | 3972a        | 77c         | 279bc        | 188c          | 293bc         | 1437 | 1444 |           |
| Decanal                              | 534          | 988          | 1103         | 1732         | 222         | 488          | 453           | 340           | 1507 | 1511 |           |
| Benzaldehyde                         | 6726ab       | 21263a       | 8849ab       | 10564ab      | 18070ab     | 16900ab      | 4186b         | 6643ab        | 1531 | 1531 |           |
| (E)-2-Nonenal                        | 185b         | 668b         | 1861a        | 2855a        | ND          | 119b         | 51b           | 42b           | 1546 | 1551 |           |
| Benzeneacetaldehyde                  | 234c         | 916bc        | 2077a        | 1819ab       | 797bc       | 676c         | 1880ab        | 1135abc       | 1651 | 1659 |           |

|                              |         |        |         |        |       |        |        |        |      |           |         |
|------------------------------|---------|--------|---------|--------|-------|--------|--------|--------|------|-----------|---------|
| 4-Ethylbenzaldehyde          | 256b    | 481a   | 72bc    | 87bc   | 5c    | 102bc  | 12c    | 7c     | 1722 | 1711-1753 |         |
| 3,5-Dimethylbenzaldehyde     | 604     | 1063   | 1443    | 870    | 977   | 1176   | 785    | 702    | 1831 | 1837      |         |
| Alkane                       |         |        |         |        |       |        |        |        |      |           |         |
| Heptane                      | 162     | 190    | 234     | 148    | 29    | 96     | 46     | 33     | 699  | 700       |         |
| Octane                       | 310     | 500    | 566     | 394    | 129   | 231    | 187    | 140    | 800  | 800       |         |
| 2,2,4,6,6-Pentamethylheptane | 442     | 169    | 377     | 271    | 161   | 83     | 491    | 387    | 943  | 915-957   |         |
| Tridecane                    | 52      | 145    | 105     | 359    | 11    | 20     | 21     | 13     | 1309 | 1300      |         |
| Pentadecane                  | 64      | 193    | 190     | 494    | 11    | 29     | 26     | 17     | 1499 | 1500      |         |
| Carboxylic acid              |         |        |         |        |       |        |        |        |      |           |         |
| Acetic acid                  | 182     | 171    | 236     | 287    | 60    | 317    | 153    | 99     | 1456 | 1400-1536 |         |
| Ester                        |         |        |         |        |       |        |        |        |      |           |         |
| Ethyl Acetate                | 177     | 328    | 109     | 278    | 223   | 260    | 427    | 271    | 891  | 850-921   |         |
| Furan                        |         |        |         |        |       |        |        |        |      |           |         |
| 2-Pentylfuran                | 58b     | 144ab  | 920a    | 356ab  | 12b   | 41b    | 31b    | 29b    | 1240 | 1193-1265 |         |
| Butyrolactone                | 246     | 211    | 216     | 121    | 18    | 126    | 58     | 38     | 1640 | 1592-1673 |         |
| Ketone                       |         |        |         |        |       |        |        |        |      |           |         |
| Acetone                      | 1476    | 1725   | 2228    | 1557   | 1762  | 1228   | 1735   | 2622   | 815  | 775-854   |         |
| 2-Butanone                   | 5117abc | 10435a | 6420abc | 8712ab | 938c  | 2639bc | 3069bc | 2563bc | 903  | 906       | 918-989 |
| 3-Methyl-2-butanone          | 265     | 622    | 623     | 604    | 954   | 661    | 591    | 434    | 926  |           |         |
| 2-Pentanone                  | 585c    | 619c   | 7929ab  | 6242b  | 1565c | 1095c  | 10676a | 6926ab | 974  | 977       |         |
| 2,3-Butanedione              | 3529b   | 7492ab | 13060a  | 13233a | 249b  | 1616b  | 303b   | 159b   | 980  | 985       | 1189    |
| 2-Heptanone                  | 1326ab  | 1270ab | 2143a   | 1570ab | 278b  | 673ab  | 1945a  | 1778ab | 1187 |           |         |

|                                             |            |            |              |              |      |        |       |       |      |      |           |
|---------------------------------------------|------------|------------|--------------|--------------|------|--------|-------|-------|------|------|-----------|
| Acetoin                                     | 8094bc     | 17092abc   | 31950a       | 25364ab      | 3c   | 6636bc | 10c   | 12c   | 1295 | 1307 |           |
| 6-Methyl-5-hepten-2-one                     | 422ab      | 643a       | 534ab        | 616a         | 117c | 306bc  | 190c  | 169c  | 1350 | 1353 |           |
| 2-Nonanone                                  | 64bc       | 84bc       | 218a         | 139ab        | 18c  | 36bc   | 192a  | 216a  | 1396 | 1398 |           |
| 2-Decanone                                  | 56c        | 88bc       | 110abc       | 112abc       | 19c  | 28c    | 323ab | 371a  | 1502 |      | 1463-1519 |
| <b>Phenol</b>                               |            |            |              |              |      |        |       |       |      |      |           |
| Estragole                                   | <b>23b</b> | <b>52a</b> | 32ab         | 19b          | 24b  | 23b    | 11b   | 12b   | 1681 |      | 1624-1701 |
| Phenol                                      | 178        | 289        | 264          | 255          | 165  | 149    | 158   | 197   | 2014 |      | 1946-2045 |
| p-Cresol                                    | 29de       | 37cde      | 85bc         | 70cd         | 11e  | 19e    | 129ab | 164a  | 2093 |      | 2031-2126 |
| 2,4-Bis(1,1-dimethylethyl)phenol            | 42         | 76         | 17           | 79           | 48   | 78     | 22    | 48    | 2296 |      | 2270-2330 |
| <b>Pyrazine</b>                             |            |            |              |              |      |        |       |       |      |      |           |
| Pyrazine                                    | 42bc       | 105ab      | 100ab        | 141a         | ND   | 50bc   | 46bc  | 117ab | 1212 |      | 1179-1257 |
| <b>Terpene</b>                              |            |            |              |              |      |        |       |       |      |      |           |
| Myrcene                                     | 71b        | 220ab      | <b>107b</b>  | <b>465a</b>  | 5b   | 60b    | 18b   | 17b   | 1172 | 1170 |           |
| D-Limonene                                  | 157bc      | 528b       | <b>178bc</b> | <b>1123a</b> | 8c   | 93bc   | 36c   | 37c   | 1194 | 1197 |           |
| 1-Methyl-4-(1-methylethylidene)-cyclohexene | 44bc       | 117b       | <b>35bc</b>  | <b>381a</b>  | ND   | 22c    | 11c   | 12c   | 1291 |      | 1233-1323 |
| $\alpha$ -Terpeniol                         | 154        | 269        | 80           | 257          | 6    | 179    | 22    | 19    | 1710 | 1716 |           |
| <b>Other</b>                                |            |            |              |              |      |        |       |       |      |      |           |
| Acetonitrile                                | 455        | 490        | 256          | 233          | 123  | 424    | 25    | 146   | 1002 |      | 988-1045  |
| Toluene                                     | 288        | 319        | 384          | 234          | 333  | 479    | 352   | 266   | 1029 |      | 1011-1093 |
| (1-                                         | 435        | 139        | 253          | 442          | 332  | 144    | 384   | 303   | 1174 |      | 1150-1236 |

|                                 |            |             |     |     |     |     |     |     |      |           |
|---------------------------------|------------|-------------|-----|-----|-----|-----|-----|-----|------|-----------|
| Methylethyl)benzene             |            |             |     |     |     |     |     |     |      |           |
| Styrene                         | 192        | 231         | 185 | 112 | 57  | 222 | 86  | 115 | 1263 | 1229-1310 |
| $\alpha$ -Methylstyrene         | 421        | 336         | 487 | 680 | 796 | 332 | 658 | 700 | 1341 | 1295-1366 |
| Benzonitrile                    | <b>69b</b> | <b>160a</b> | 92b | 85b | 67b | 92b | 42b | 40b | 1614 | 1570-1637 |
| Dimethyl sulfone                | 67         | 42          | 186 | 31  | 19  | 30  | 21  | 28  | 1916 | 1869-1914 |
| 1,3-Di-<br>isopropylnaphthalene | 46         | 134         | 24  | 210 | 4   | 24  | 5   | 5   | 2164 | 2139-2162 |
| 1,7-Di-<br>isopropylnaphthalene | 35         | 101         | 8   | 160 | 2   | 18  | 3   | 1   | 2179 | 2154-2178 |

**A**

Abundance

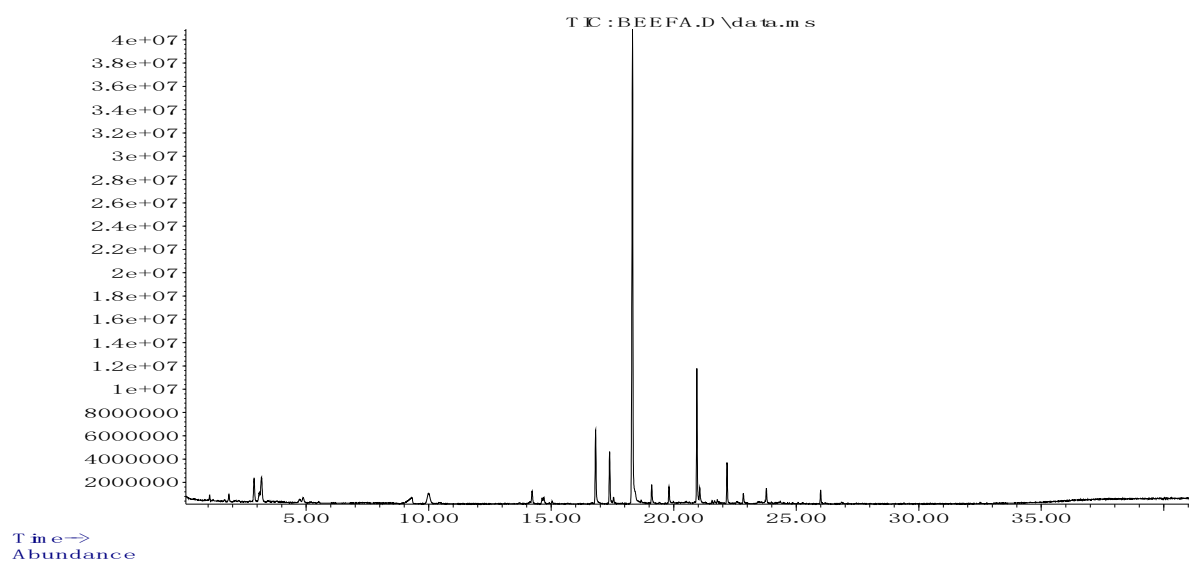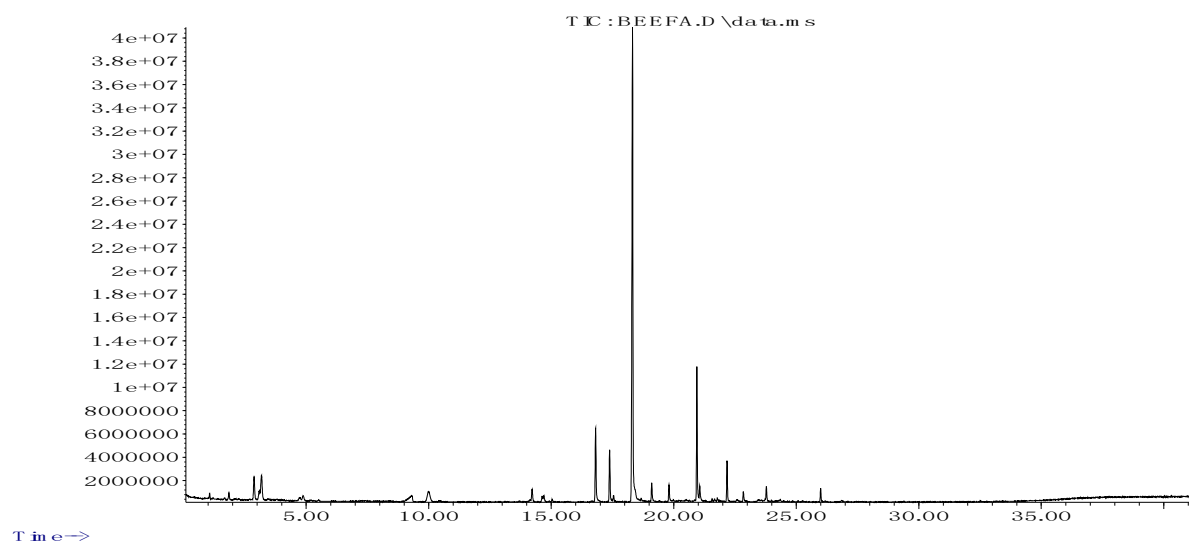

Abundance

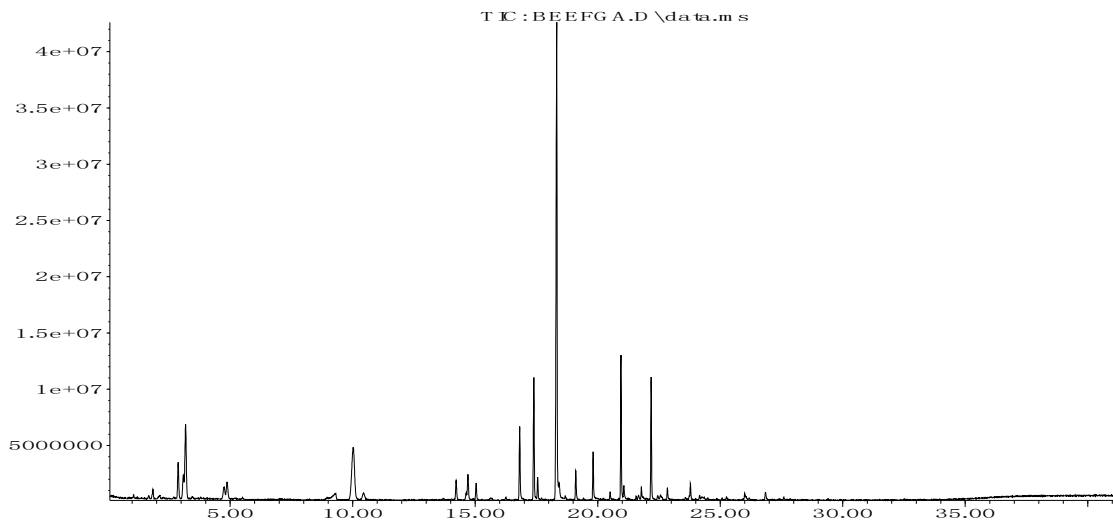

Abundance

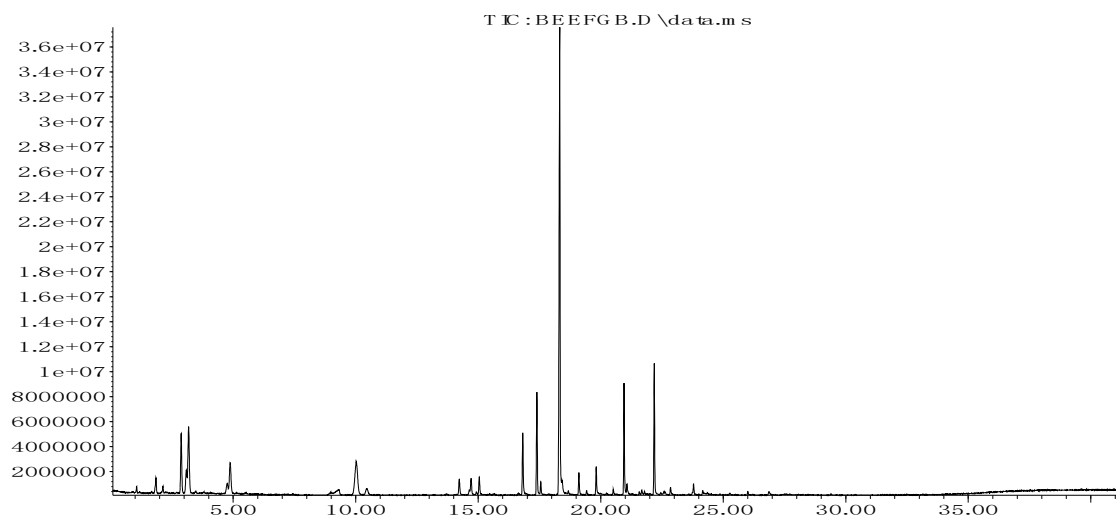

**B**

Abundance

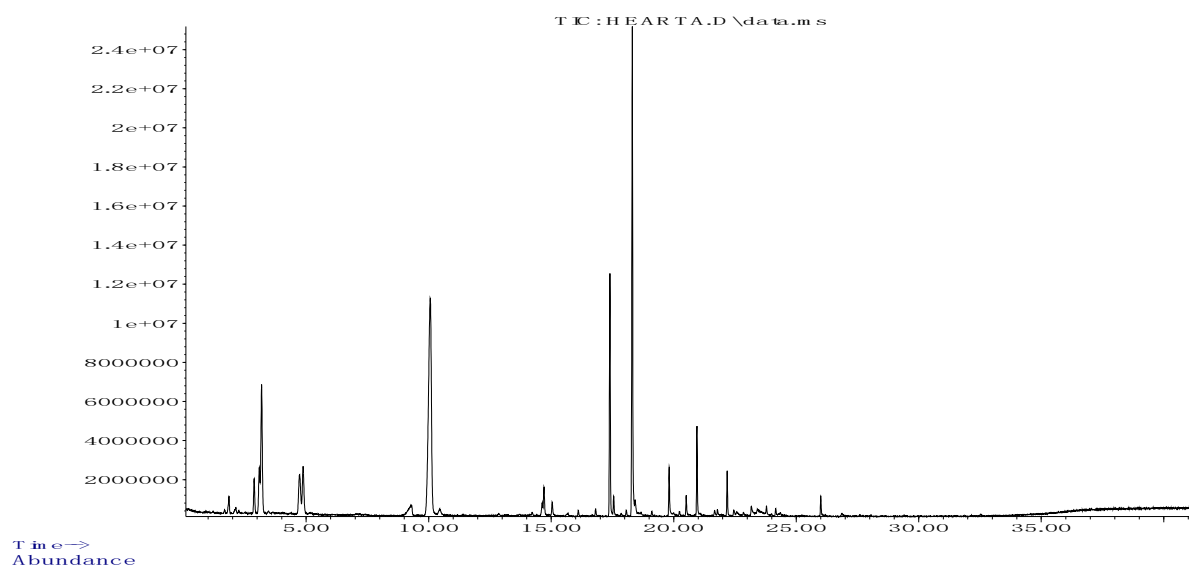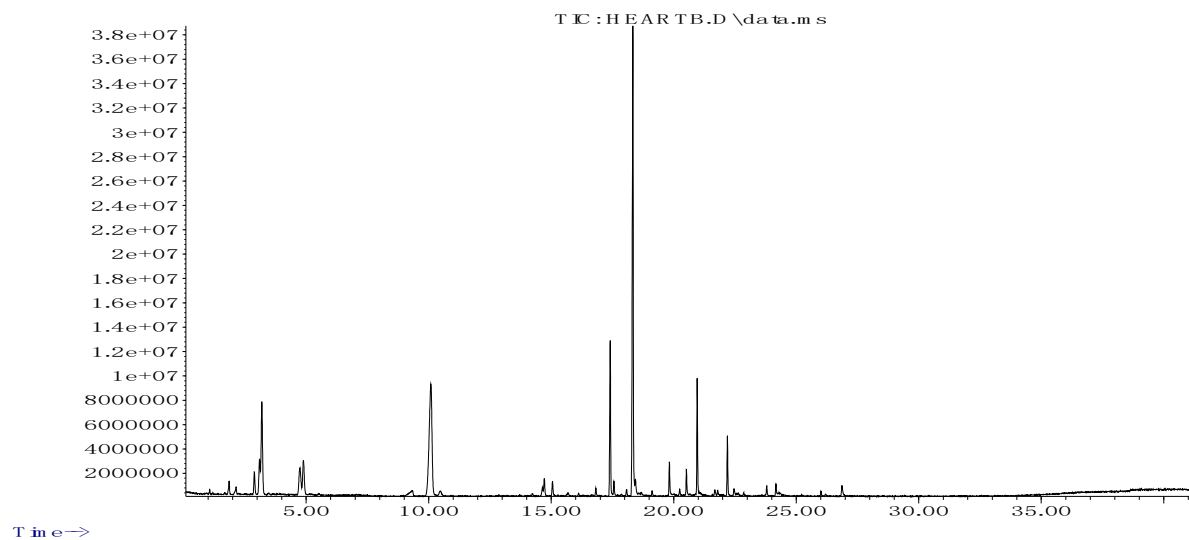



Abundance

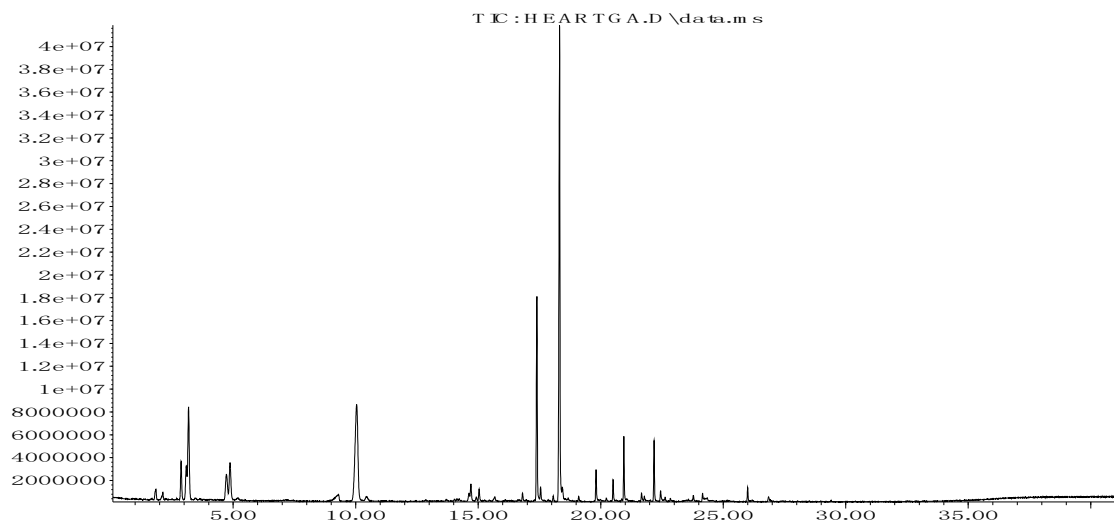

Time→

Abundance

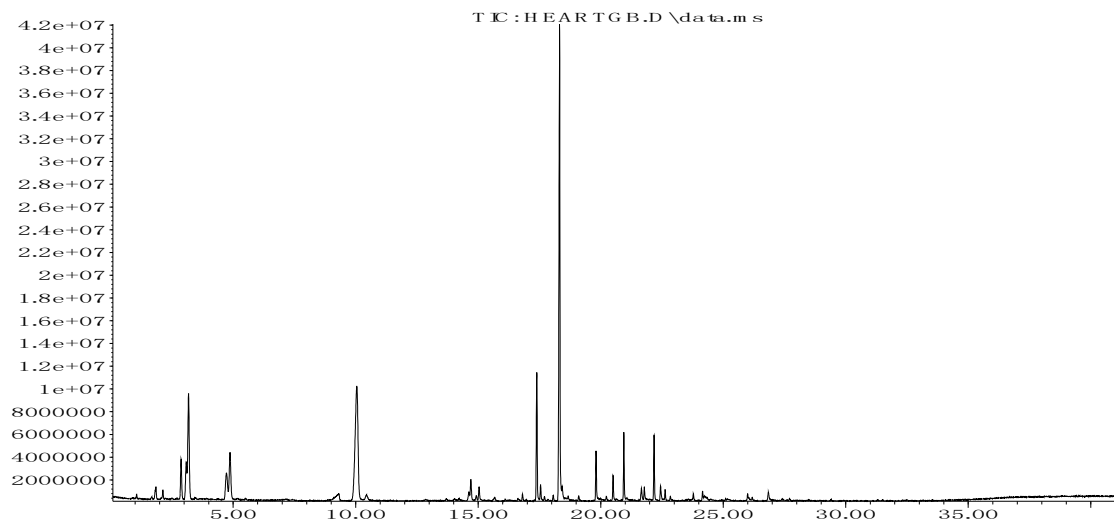

Time→

C

Abundance

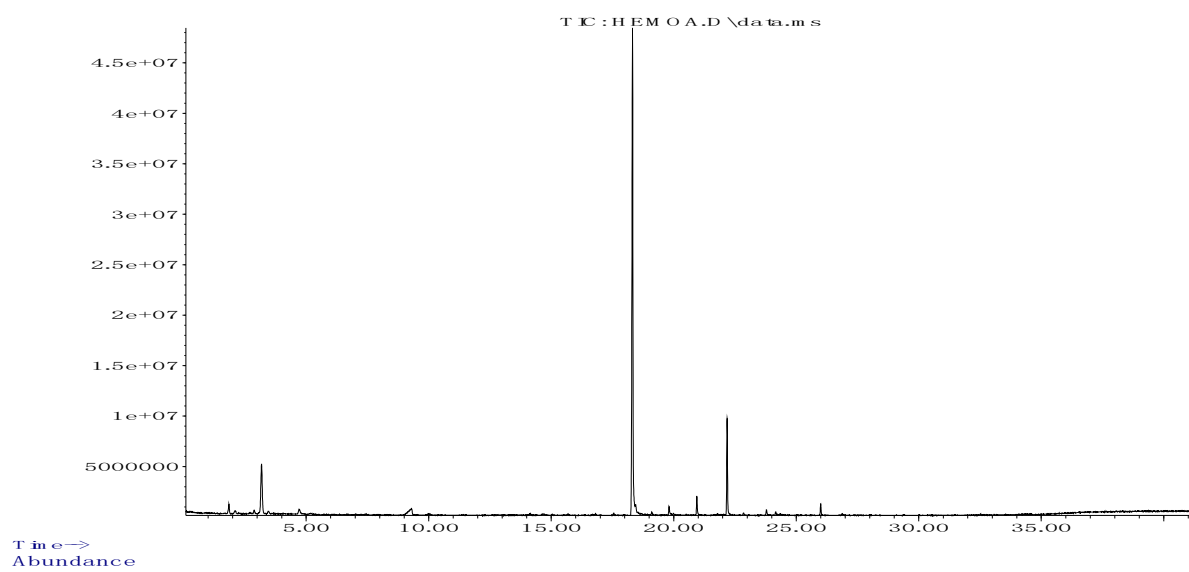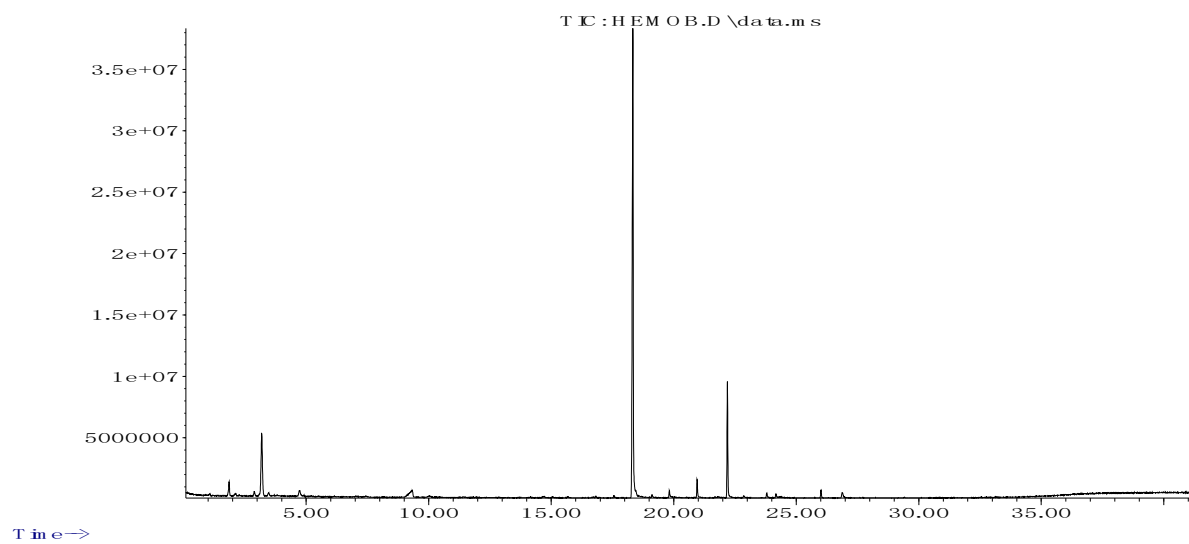

Abundance

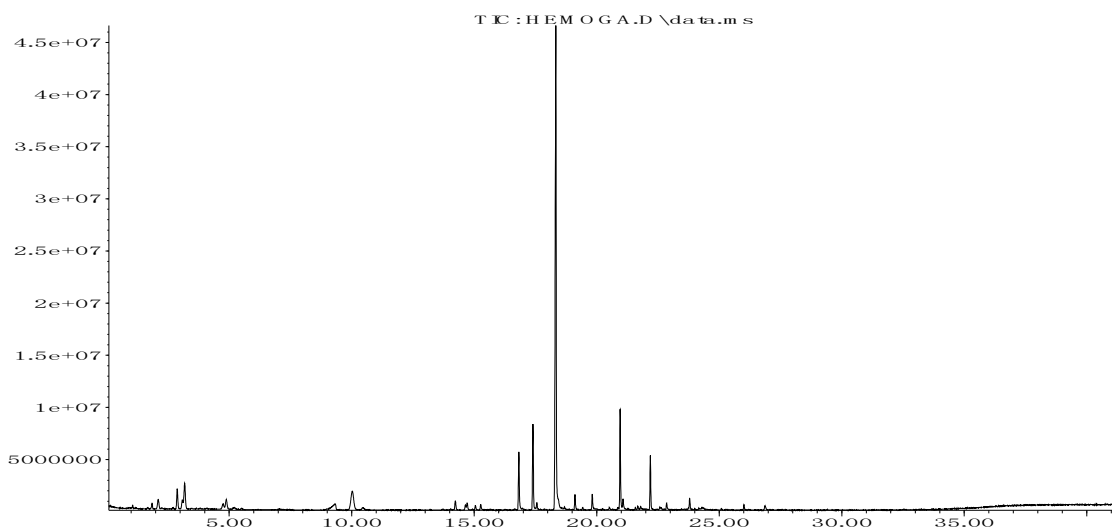

Time→

Abundance

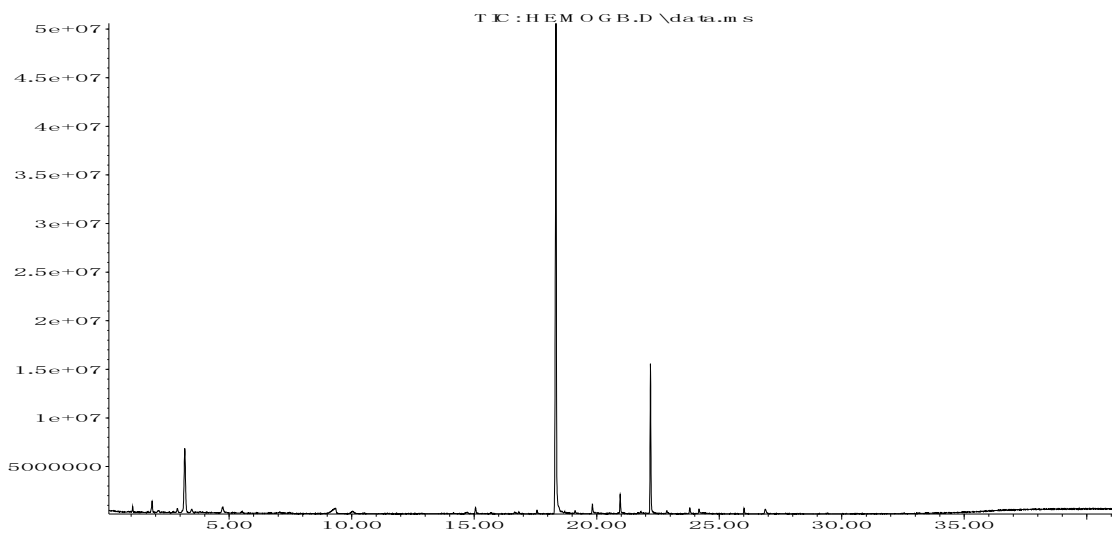

Time→

D

Abundance

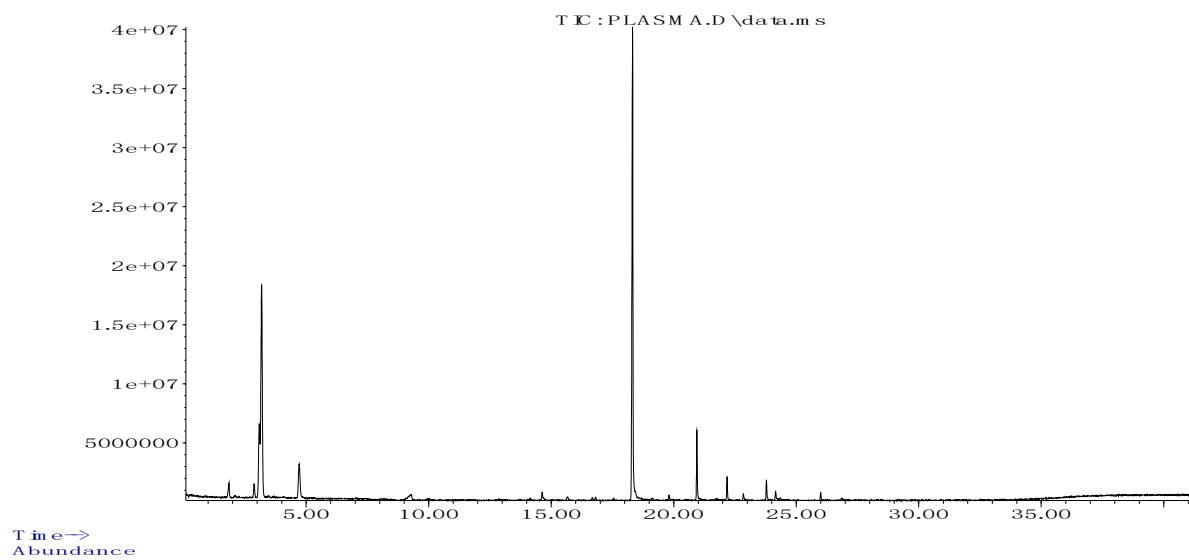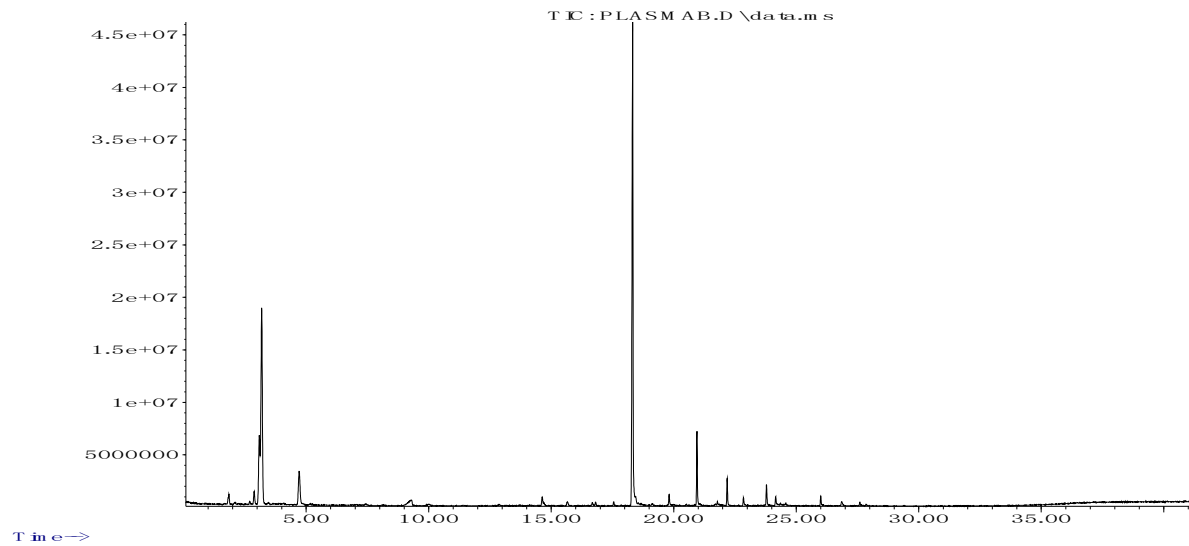

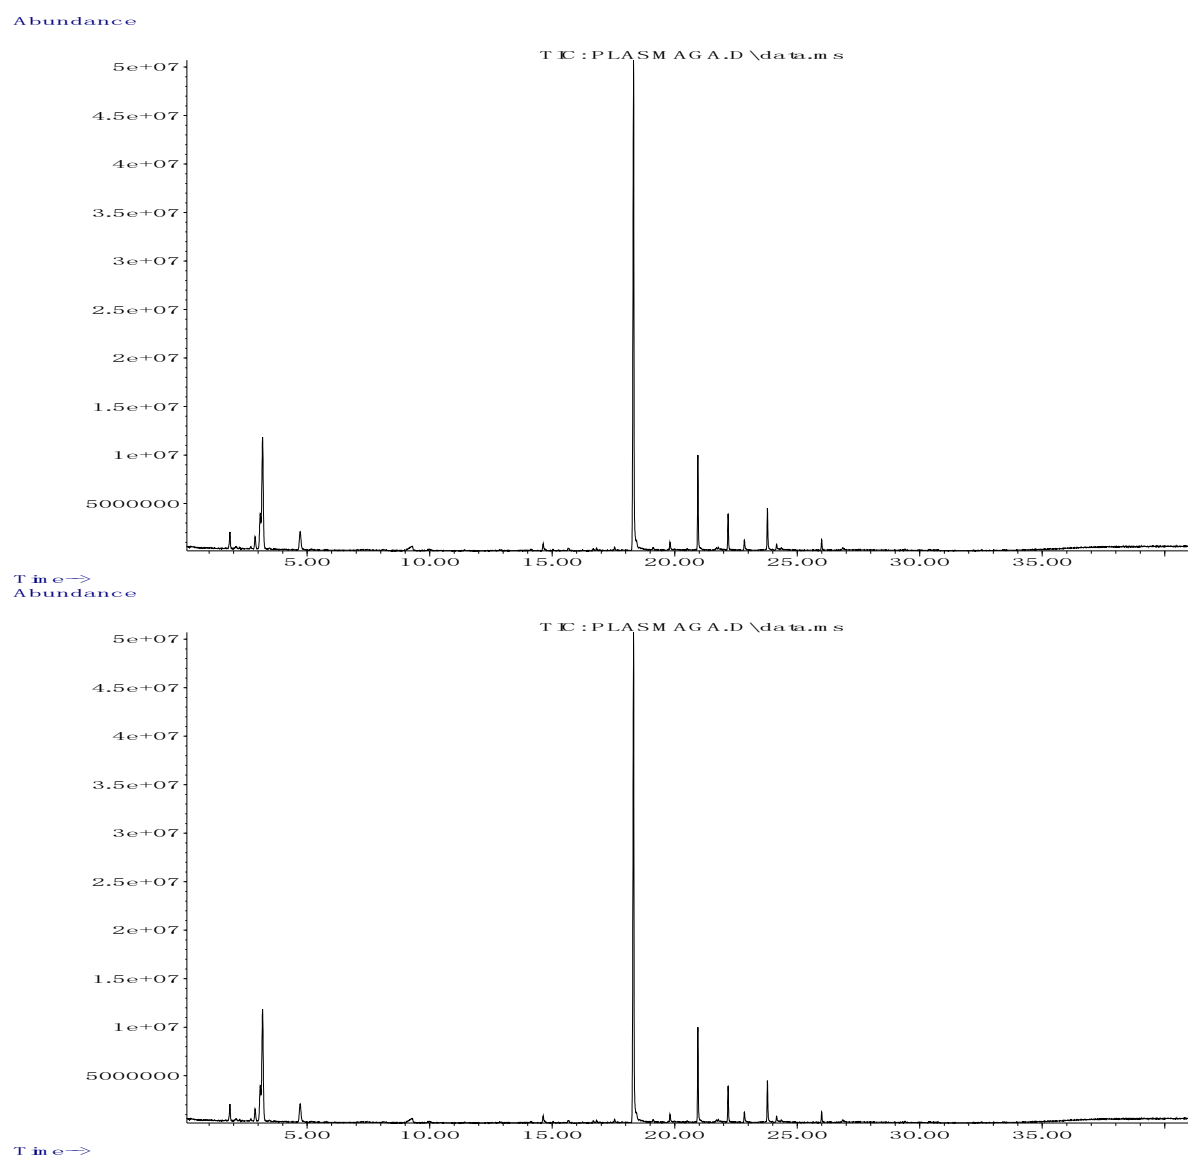

**Figure S1.** Chromatograms showing the volatile composition of hydrolysates of **A** minced bovine meat (BEEF), **B** bovine heart (HEART), **C** porcine hemoglobin (HEMO), and **D** porcine plasma (PLASMA) in duplicates (A and B) with or without glucosamine (G).
